# Supplementary material
Source: Research Square preprint supplement (doi:10.21203/rs.3.rs-9306751/v1)
Supplement: Supplementary file 1 [file 8c3c5ef18d2fbda0286e225f.docx]

**Supplementary Notes**

**Collapse of the elastic Hilbert space enabling single-polarization bulk propagation**

**Chung Il Park¹,*, Hong Jae Kim2, Hong Min Seung³, and Joohwan Oh⁴**

*1Department of Mechatronics Engineering, Kangwon National University, Chuncheon 24341, Republic of Korea*

*2Semiconductor Research Institute, Samsung Electronics, Suwon 16677, Republic of Korea
3Intelligent Wave Engineering Team, Korea Research Institute of Standards and Science (KRISS), Daejeon 34113, Republic of Korea
4Department of Mechanical Engineering, Seoul National University, Seoul 08826, Republic of Korea*

**Supplementary Note 1**

**Definition of polarization metric**

Elastic polarization metrics used throughout this work are defined based on the decomposition of elastic strain energy into symmetry-distinct components. For a given elastic eigenmode with displacement field **u**(**x**), the strain tensor is defined as

|  | , | (S1) |
| --- | --- | --- |

The strain tensor is decomposed into volumetric and deviatoric components as

|  | , | (S2) |
| --- | --- | --- |

Where

|  | , | (S3a) |
| --- | --- | --- |
|  | , | (S3b) |

The total elastic strain energy is given by

|  | , | (S4) |
| --- | --- | --- |

where **C** is the elastic stiffness tensor and *V* denotes the unit-cell volume.

Polarization weights are defined as the normalized strain–energy contributions of each symmetry-distinct subspace

|  | , , , | (S5) |
| --- | --- | --- |

where *U*vol, *U*SH ​, and *U*SV denote the elastic energies associated with volumetric, shear-horizontal, and shear-vertical strain components, respectively. These quantities define the occupation of each strain–energy subspace and are used throughout the manuscript to characterize elastic polarization.

To quantify the strength of Hilbert-space collapse, we further define the maximum polarization weight,

|  | , | (S6) |
| --- | --- | --- |

and the dominance gap,

|  | , | (S7) |
| --- | --- | --- |

where *P*2nd is the second-largest polarization weight. Large values of *P*max ​and Δ*P* indicate strong confinement of elastic energy within a single strain–energy subspace.

In numerical simulations, polarization weights were evaluated using a displacement-based implementation consistent with Bloch-wave kinematics. Specifically, displacement fields were projected onto longitudinal and transverse bases defined by the Bloch wavevector, and the corresponding kinetic-energy–weighted components were used to compute polarization fractions. We verified that this displacement-based evaluation yields identical classification of admissible and non-admissible polarization channels within the frequency ranges considered. For conceptual clarity, the main text adopts the strain–energy–based formulation, which provides a symmetry-consistent definition of elastic polarization and directly reflects the structure of the elastic Hilbert space.

**Supplementary Note 2**

**Effective strain–energy metrics and structural hierarchy**

Elastic polarization collapse in the present system is governed by the relative hierarchy of strain–energy metrics associated with volumetric and deviatoric deformation pathways. These metrics are structurally encoded in the geometry of the meta-atom through the direction-dependent bending stiffness of its constituent elements.

In bending-dominated elastic architectures, the effective stiffness of a slender beam scales as

|  | , | (S8) |
| --- | --- | --- |

where the summations run over bending elements contributing to deformation along a given symmetry channel. While the numerical prefactors depend on geometric details, they do not affect the relative ordering of strain–energy metrics that determines polarization admissibility.

The geometric parameters introduced in Fig. 4 are therefore not treated as continuous tuning variables, but as structural controls that preserve or disrupt the intended hierarchy of strain–energy metrics. In particular, ratios of effective bending stiffnesses provide a convenient engineering-level representation of the relative energetic cost associated with volumetric and deviatoric strain pathways,

|  | , | (S9) |
| --- | --- | --- |

up to constant prefactors that do not influence admissibility classification. When a clear ordering exists among the strain–energy metrics (*ηαβ* ≫ 1 or *ηαβ* ≪ 1), one strain channel becomes energetically inaccessible under Bloch periodicity.

This formulation establishes a direct correspondence between the abstract strain–energy Hilbert-space metrics introduced in the main text and the structural features of the meta-atom geometry. The emergence or disappearance of single-polarization admissibility therefore reflects whether the hierarchy of strain–energy metrics is preserved, rather than fine-tuning of absolute resonance frequencies or continuous parameter variation.

**Supplementary Note 3**

**Numerical implementation details**

Numerical simulations were performed using finite-element eigenfrequency analysis implemented in COMSOL Multiphysics. Three-dimensional periodic unit cells were analyzed under Bloch boundary conditions to compute elastic eigenmodes and corresponding strain fields.

Bulk band structures were obtained by sweeping the Bloch wavevector along the principal directions of the cubic Brillouin zone (Γ–X, Γ–Y, and Γ–Z). To isolate the role of the strain–energy metric from Bloch kinematics, the analyses associated with Fig. 4 were performed at the Γ point (k = 0), where the structure of the elastic Hilbert space is most clearly resolved.

Eigenmodes were sorted by frequency, and polarization metrics were evaluated for each mode using the strain–energy decomposition described in Supplementary Note 1. Representative modes were selected by tracking strain–energy eigenstates across hierarchy-preserving and hierarchy-breaking structural configurations.

Mesh convergence tests confirmed that the polarization metrics and admissibility classification were insensitive to further mesh refinement. All simulations were performed using identical material properties and unit-cell topology to ensure consistent comparison across parameter space.
